# Supplementary material for: A Customizable Suite of Methods to Sequence and Annotate Cattle Antibodies
Source: MDPI journal article supplement (doi:10.3390/vaccines11061099), 2023-06-14
Supplement: s1 [file s1]

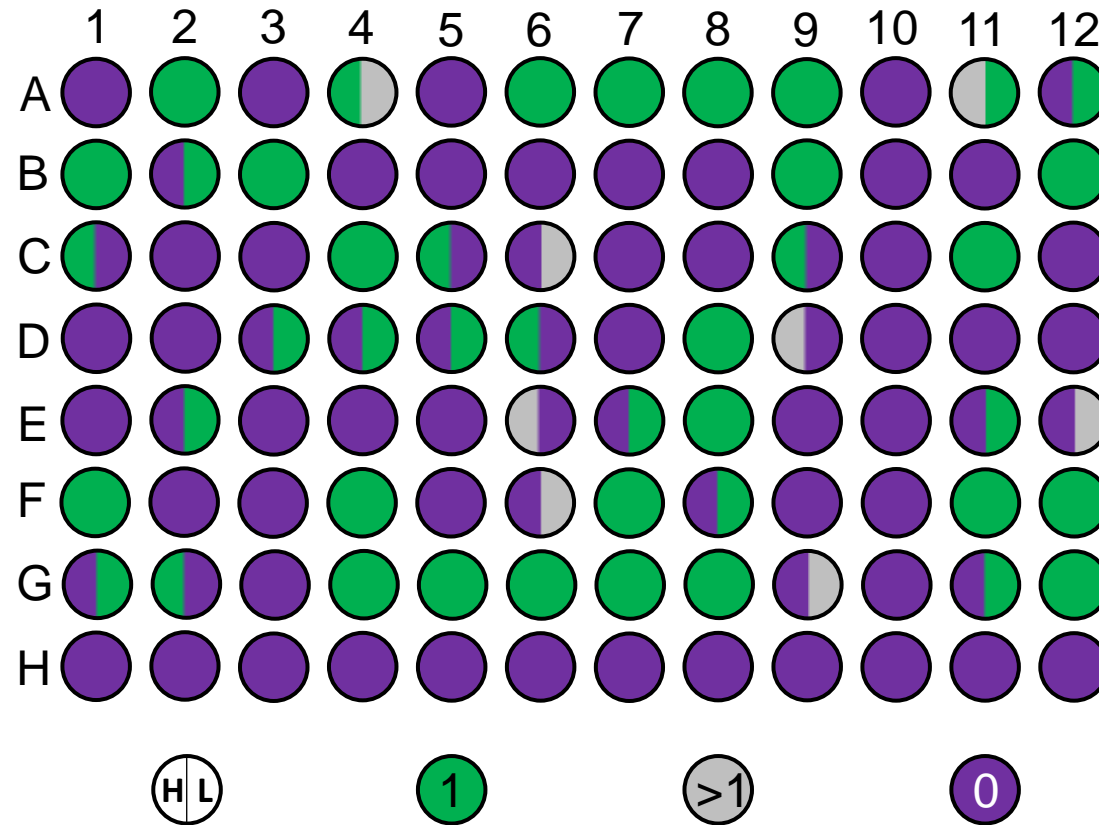

**Figure S1A:** Graphic representation of H and L chains recovery by the low throughput amplification and sequencing strategy from 84 single cells sorted in rows A to G. The left side of the well represents the H chain status and the right side represents the L chain status. Green represents a unique chain amplification, grey represents multiple chains amplified, and purple represents failed sequencing of a productive chain.

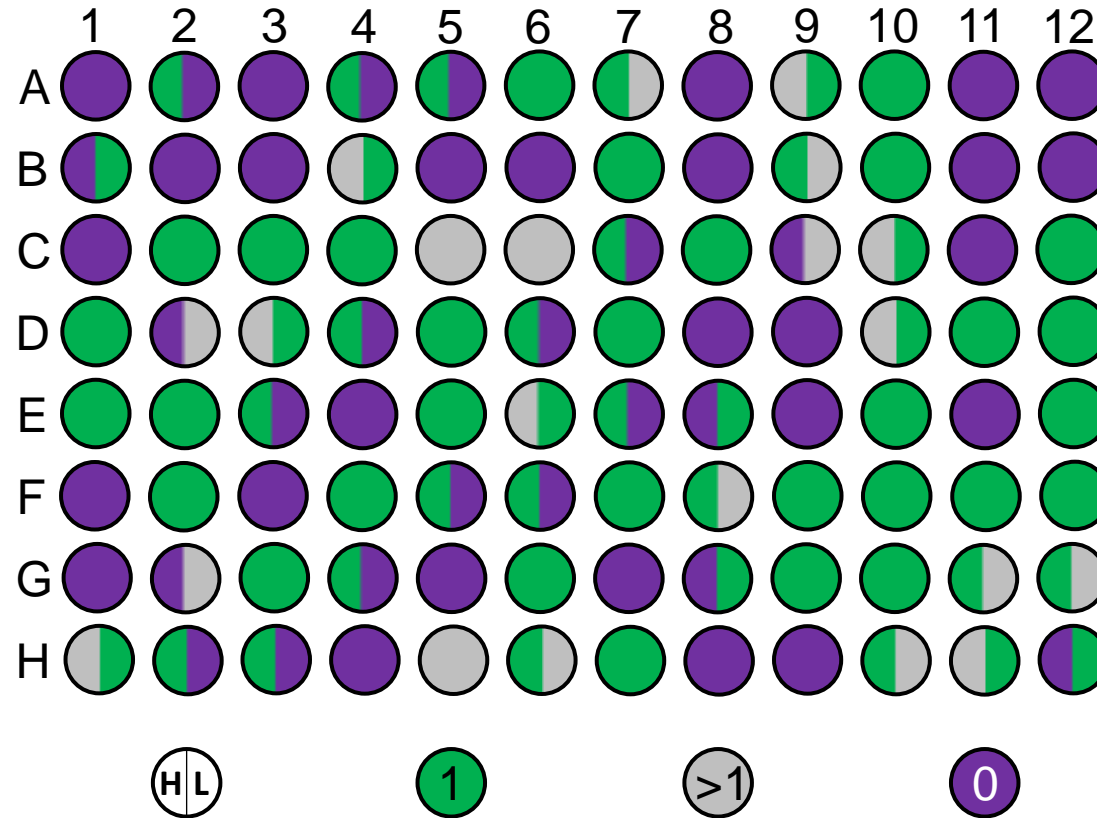

**Figure S1B:** Graphic representation of H and L chains recovery by the medium throughput amplification and sequencing strategy from 96 single cells sorted in rows A to H. The left side of the well represents the H chain status and the right side represents the L chain status. Green represents a unique chain amplification, grey represents multiple chains amplified, and purple represents failed sequencing of a productive chain.

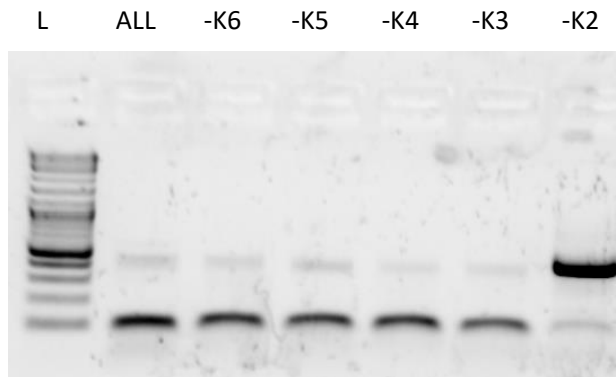

**Figure S2:** Testing IgK multiplexing. cDNA amplification of IgK rearrangements with IgK\_C2 paired with all IgK V gene segment specific primers (ALL, amplicon expected size: ~500bp), or all except one of the forward primers at a time (-K2 to -K6 for IgK\_L2 to IgK-L6 primers), showing that IgK\_L1 inhibits the multiplexed reaction and cannot be included for multiplexing. L: NEB 1Kb Plus ladder.

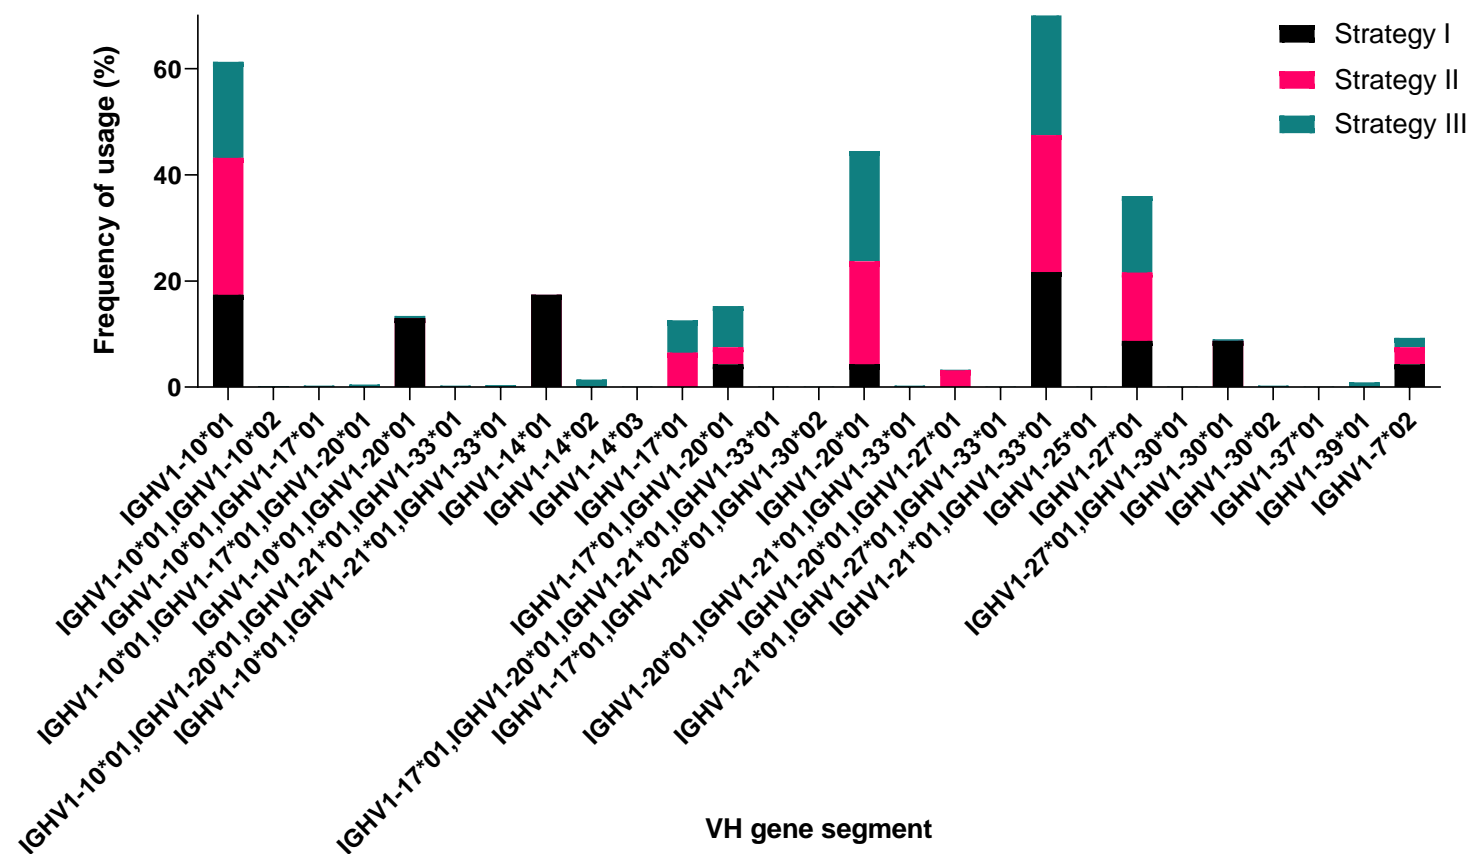

**Figure S3:** V<sub>H</sub> gene segment usage. Usage frequencies of the heavy chain variable (V<sub>H</sub>) gene segments used by antibody pairs recovered using amplification strategy I (black), strategy II (pink) and strategy III (cyan).
